# Supplementary material for: Cooperativity between the 3’ untranslated region microRNA binding sites is critical for the virulence of eastern equine encephalitis virus
Source: PubMed Central journal article supplement (PMC6936876; doi:10.1371/journal.ppat.1007867), 2019-10-28
Supplement: ppat.1007867.s007.pdf [file ppat.1007867.s007.pdf]

| Primer                    | Sequence                                                               |
|---------------------------|------------------------------------------------------------------------|
| EEEV $\Delta$ miR-142-1-F | 5'-taacatcttggtcaaccacataactcaagaggcagtgta-3'                          |
| EEEV $\Delta$ miR-142-1-R | 5'-attgtagaacagttgggtgtattgagttctccgtcacat-3'                          |
| EEEV $\Delta$ miR-142-2-F | 5'-taaggctgtcttactaaactcaagattcacctag-3'                               |
| EEEV $\Delta$ miR-142-2-R | 5'-ctagggtgaatcttgagtttagtaagacagcctta-3'                              |
| EEEV $\Delta$ miR-142-3-F | 5'-gcataattgccgtatatacaattactcaagaggtaatataccgcctcttataaa-3'           |
| EEEV $\Delta$ miR-142-3-R | 5'-tttataagaggcggtatattacctcttgagtaattgtatatacggcaattatgc-3'           |
| EEEV $\Delta$ miR-142-4-F | 5'-ataccgcctcttataaaactcaagaggcagcgc-3'                                |
| EEEV $\Delta$ miR-142-4-R | 5'-gcgctgcctcttgagtttataagaggcggtat-3'                                 |
| WEEV McM 11224-S          | 5'-<br>cttataaacacacgtagatgactgagcgcgccatacacactttataaattcttttat-3'    |
| WEEV McM 11224-AS         | 5'-<br>ataaaagaatttataaagtgtgtatggccgcgctcagtcacatctacgtgtgtttataag-3' |
